# Supplementary material
Source: Springer Nature journal article supplement (http://www.springermedizin.de/resource/supplementary/12906_2011_387_MOESM1_ESM.pdf/9519662)

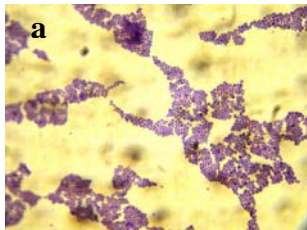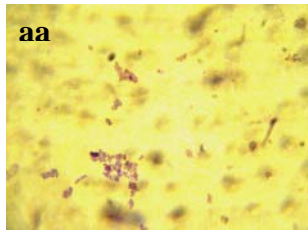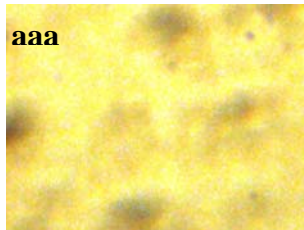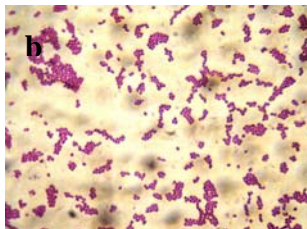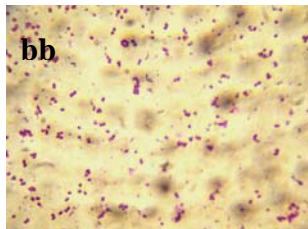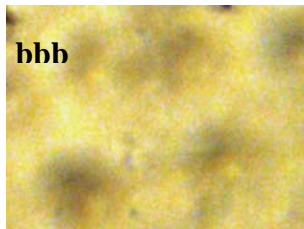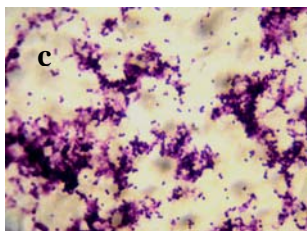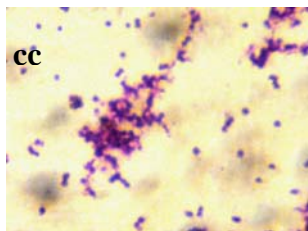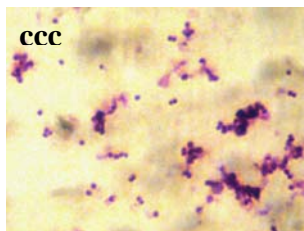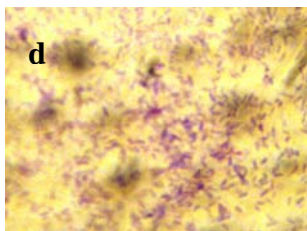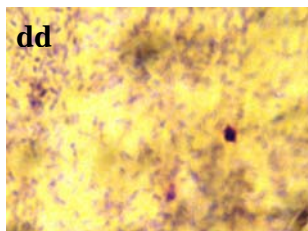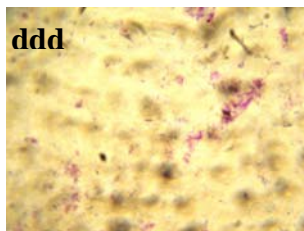

Supplement: MOESM1 [file 9519662]
